# Supplementary material for: Glycolytic regulatory enzyme PFKFB3 as a prognostic and tumor microenvironment biomarker in human cancers
Source: publisher site journal article supplement (doi:10.18632/aging.204758), 2023-05-30
Supplement: Supplementary file [file aging-v15i10-204758-supplementary-material-SD1.pdf]

## SUPPLEMENTARY FIGURES

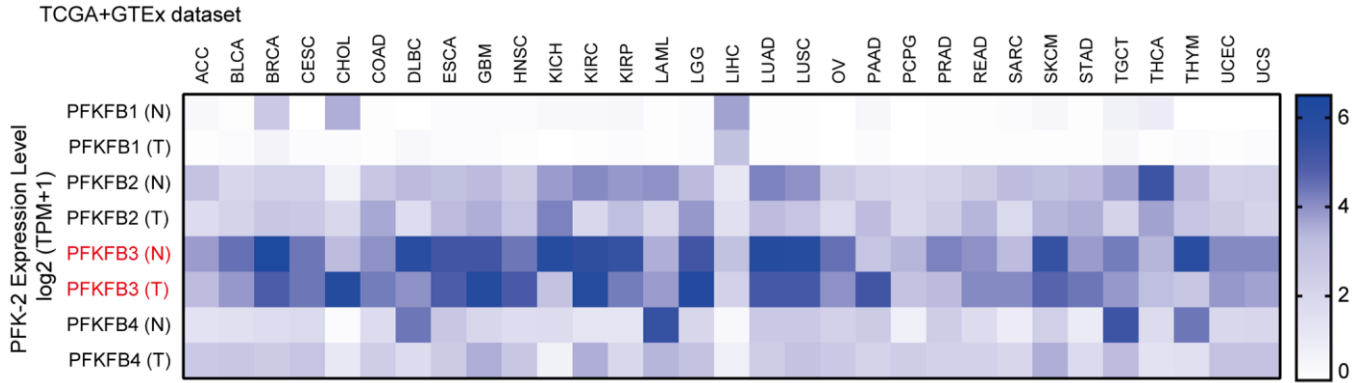

**Supplementary Figure 1. The mRNA expression level of PFK-2 family genes.** The heatmap of PFK-2 family genes, including *PFKFB1*, *PFKFB2*, *PFKFB3*, and *PFKFB4*, the expression level in tumor and non-tumor patients.

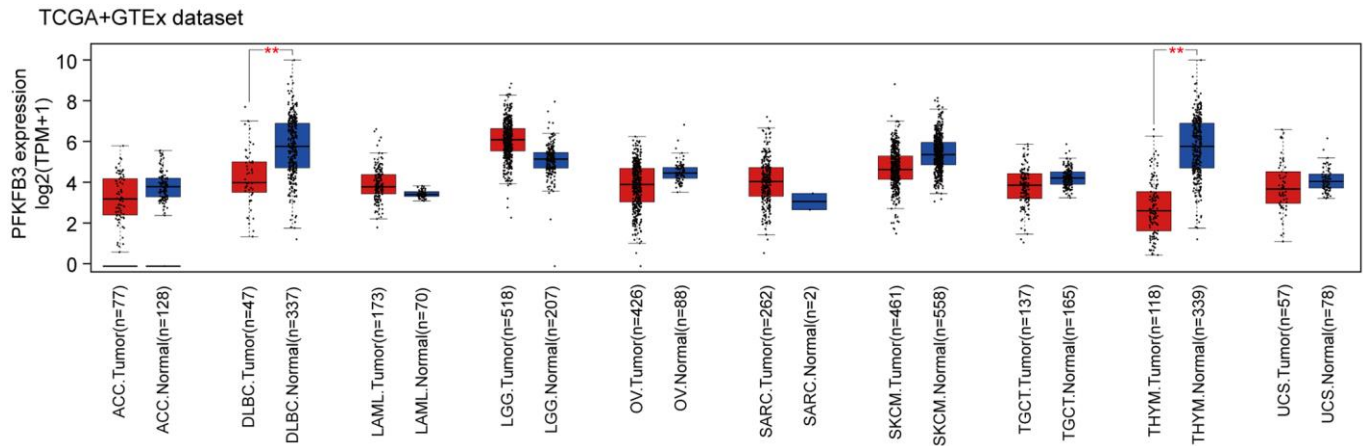

**Supplementary Figure 2. The expression level of *PFKFB3* in pan-cancer.** Combining TCGA and GTEx datasets, we further analyze the expression level of *PFKFB3* in ACC, DLBC, LAML, LGG, OV, SARC, SKCM, TGCT, THYM, and UCS.

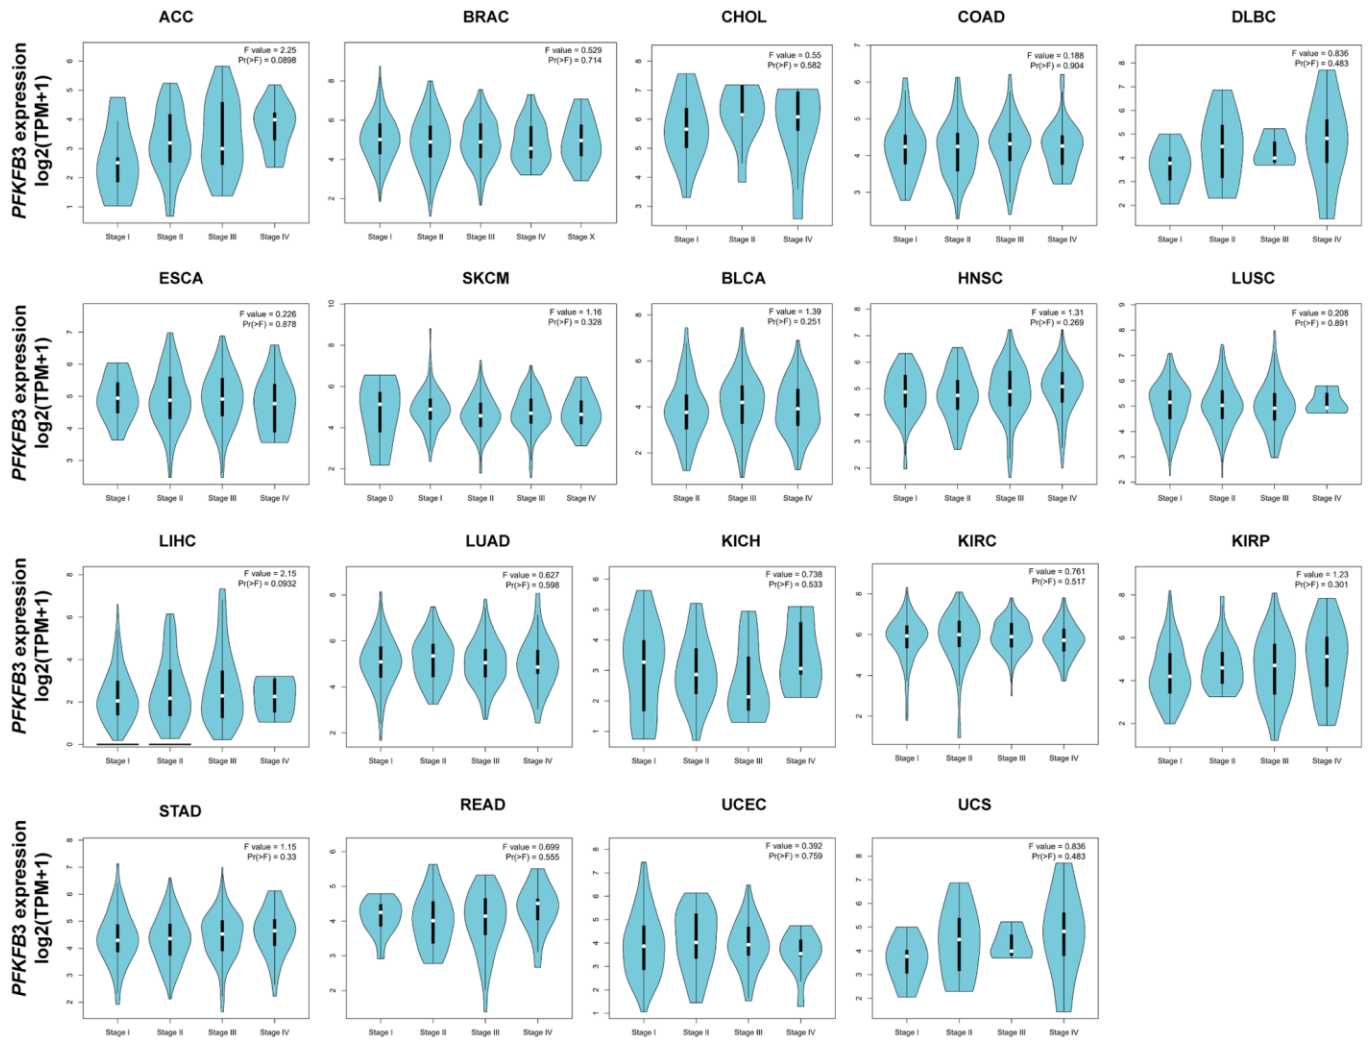

**Supplementary Figure 3. *PFKFB3* gene expression in the pathological stage in pan-cancer.** We utilized GEPIA2 to analyze the characteristic of *PFKFB3* expression in the pathological stage of pan-cancer.

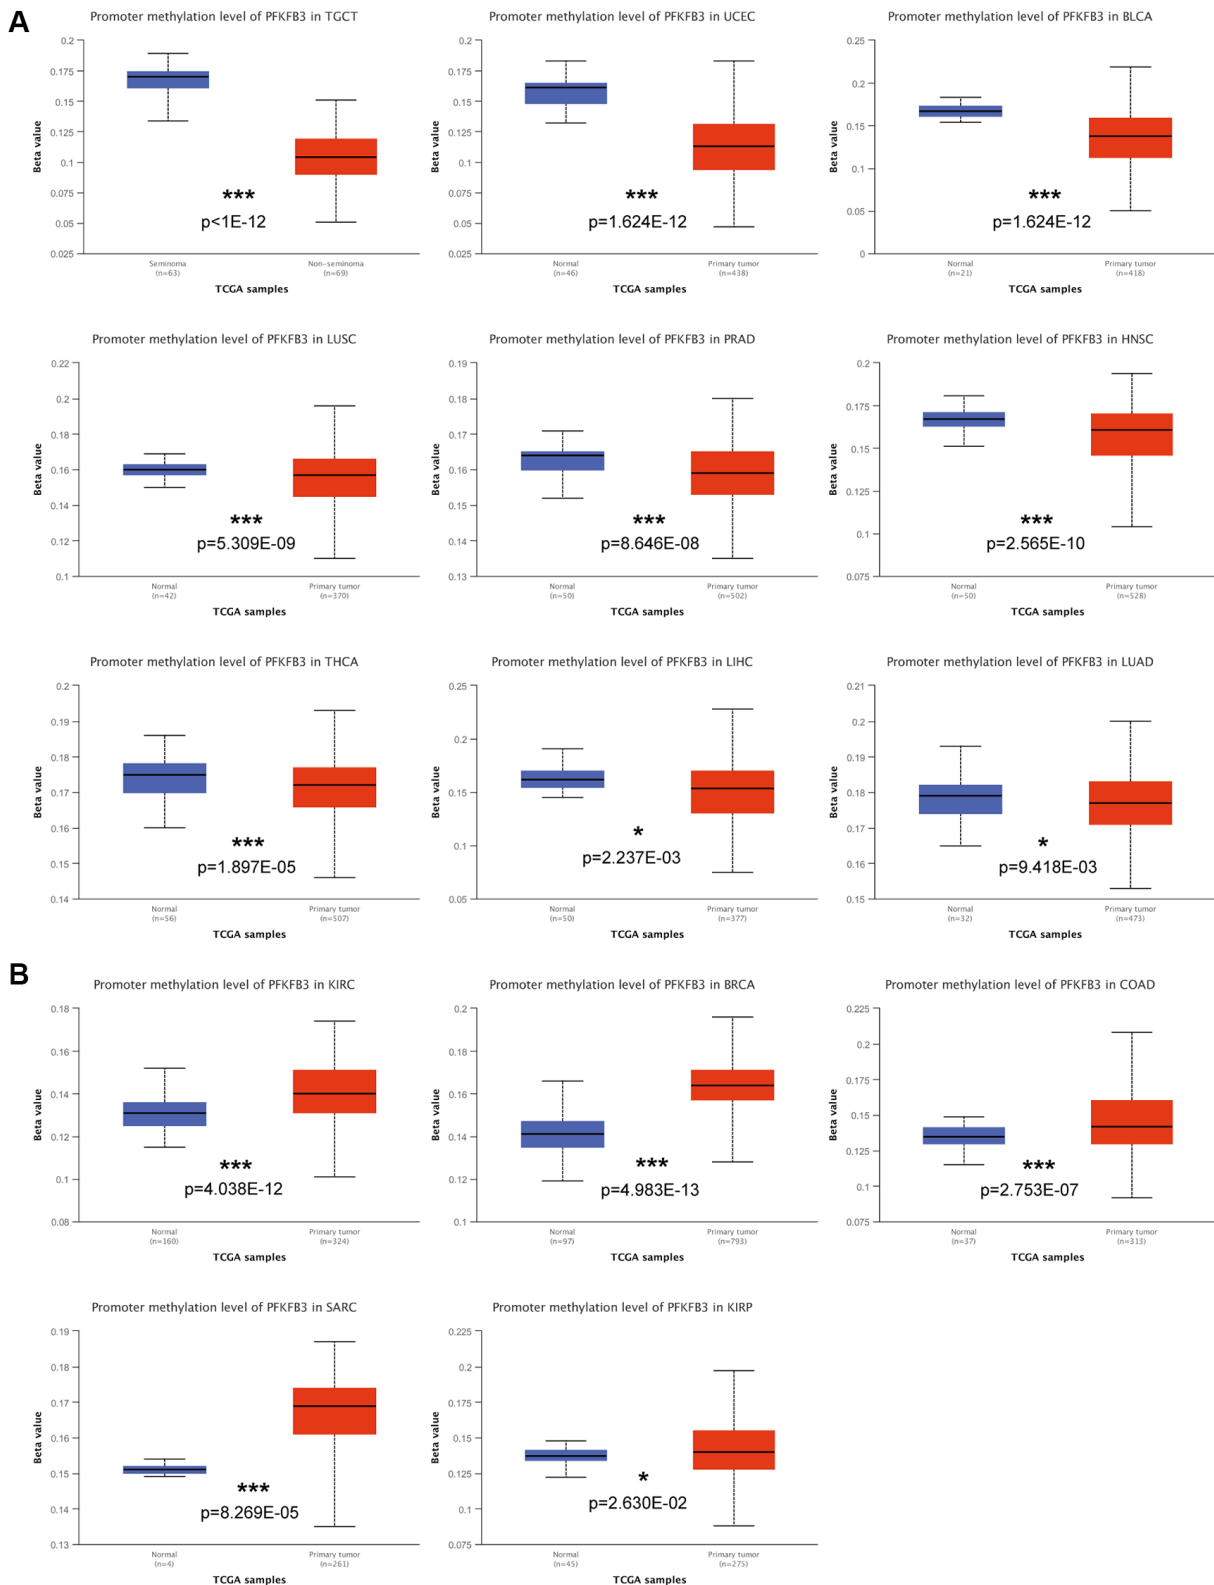

**Supplementary Figure 4. The methylation levels of *PFKFB3* in pan-cancer.** UALCAN database to investigate the promoter methylation level of *PFKFB3* in human pan-cancer. (A) The promoter methylation level of *PFKFB3* was significantly decreased. (B) The promoter methylation level of *PFKFB3* was significantly increased. \* $P < 0.05$ ; \*\* $P < 0.01$ ; \*\*\* $P < 0.001$ .

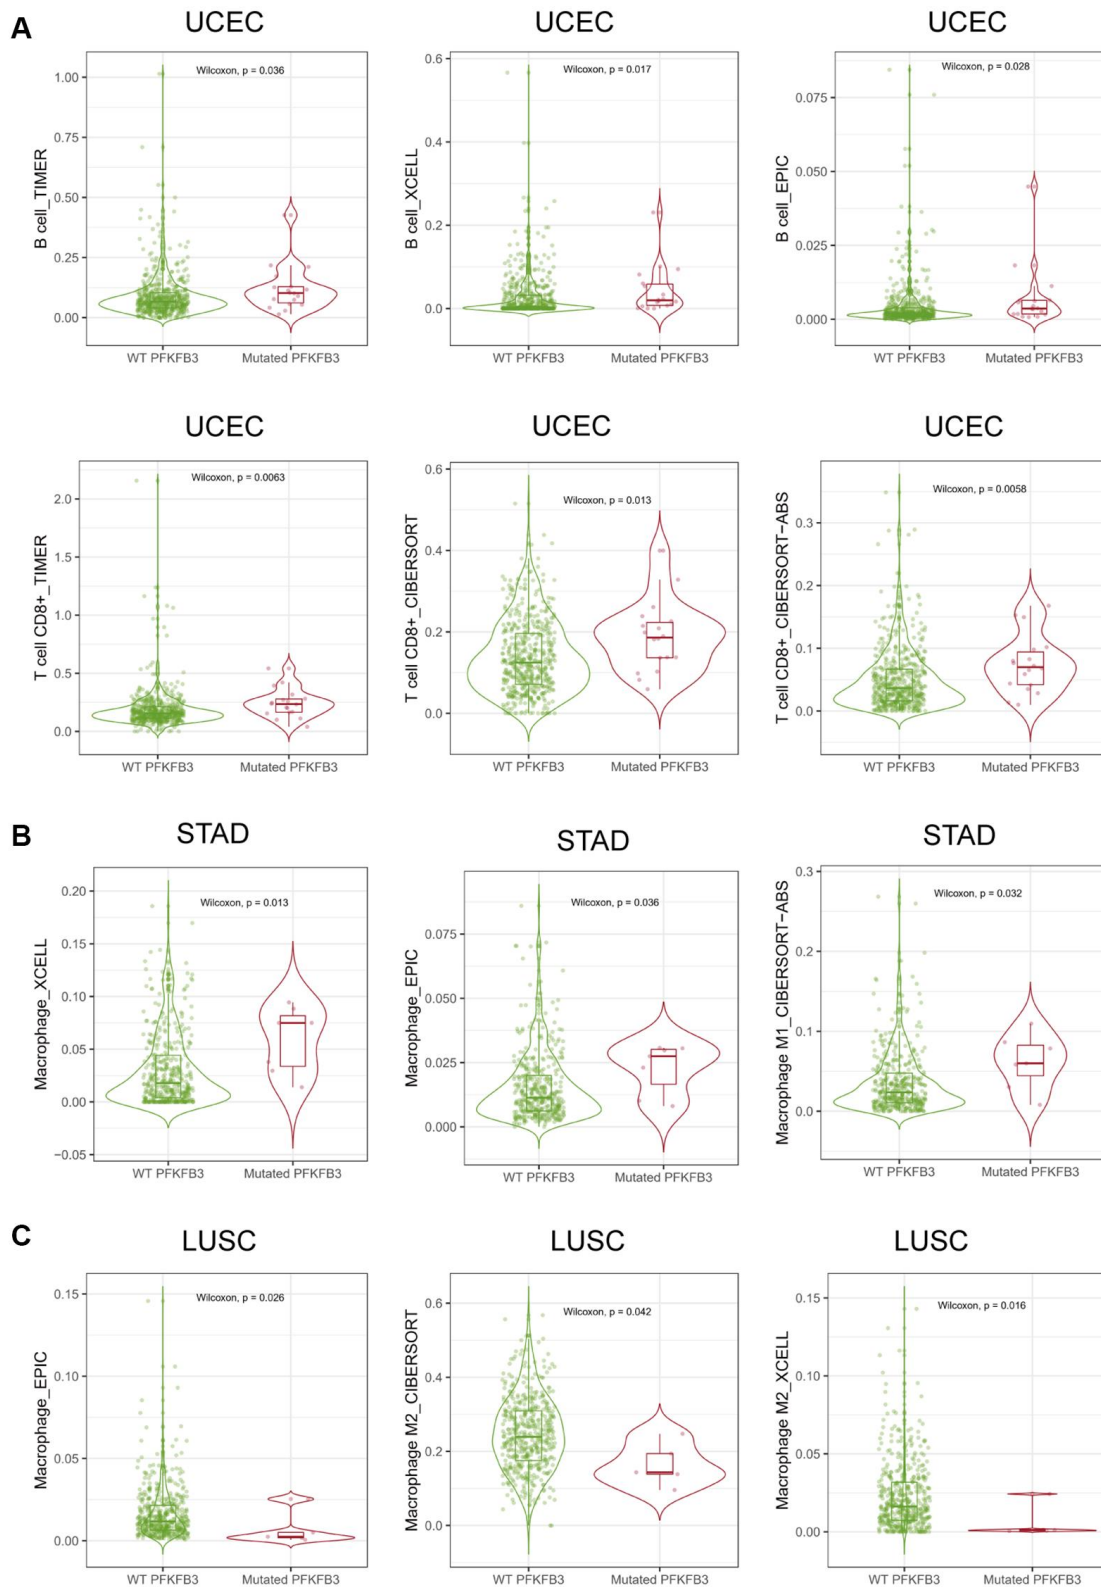

**Supplementary Figure 5. The correlation of mutated PFKFB3 and the immune infiltration.** We utilized TIMER 2.0 to analyze the correlation of mutated *PFKFB3* and the immune infiltration in UCEC (A), STAD (B), and LUSC (C).

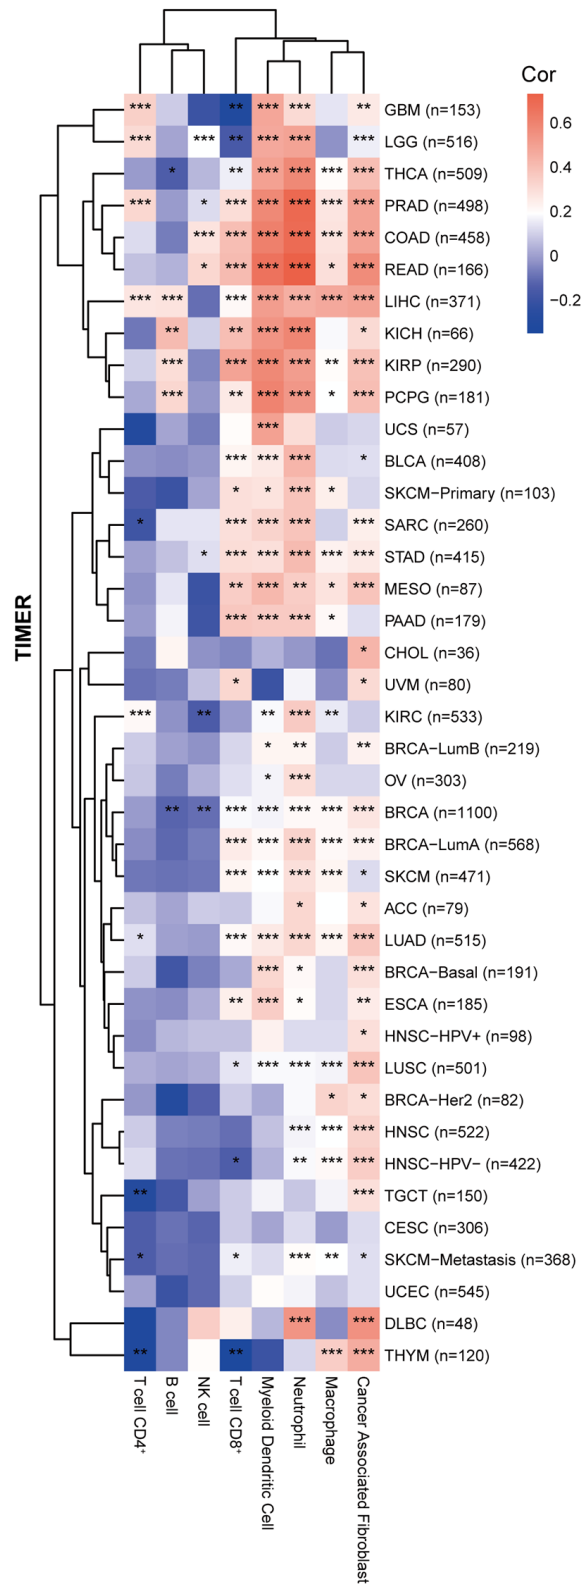

**Supplementary Figure 6. The correlation between *PFKFB3* expression and immune infiltration.** Correlation analysis between *PFKFB3* expression and immunological infiltration in pan-cancer by TIMER algorithm.

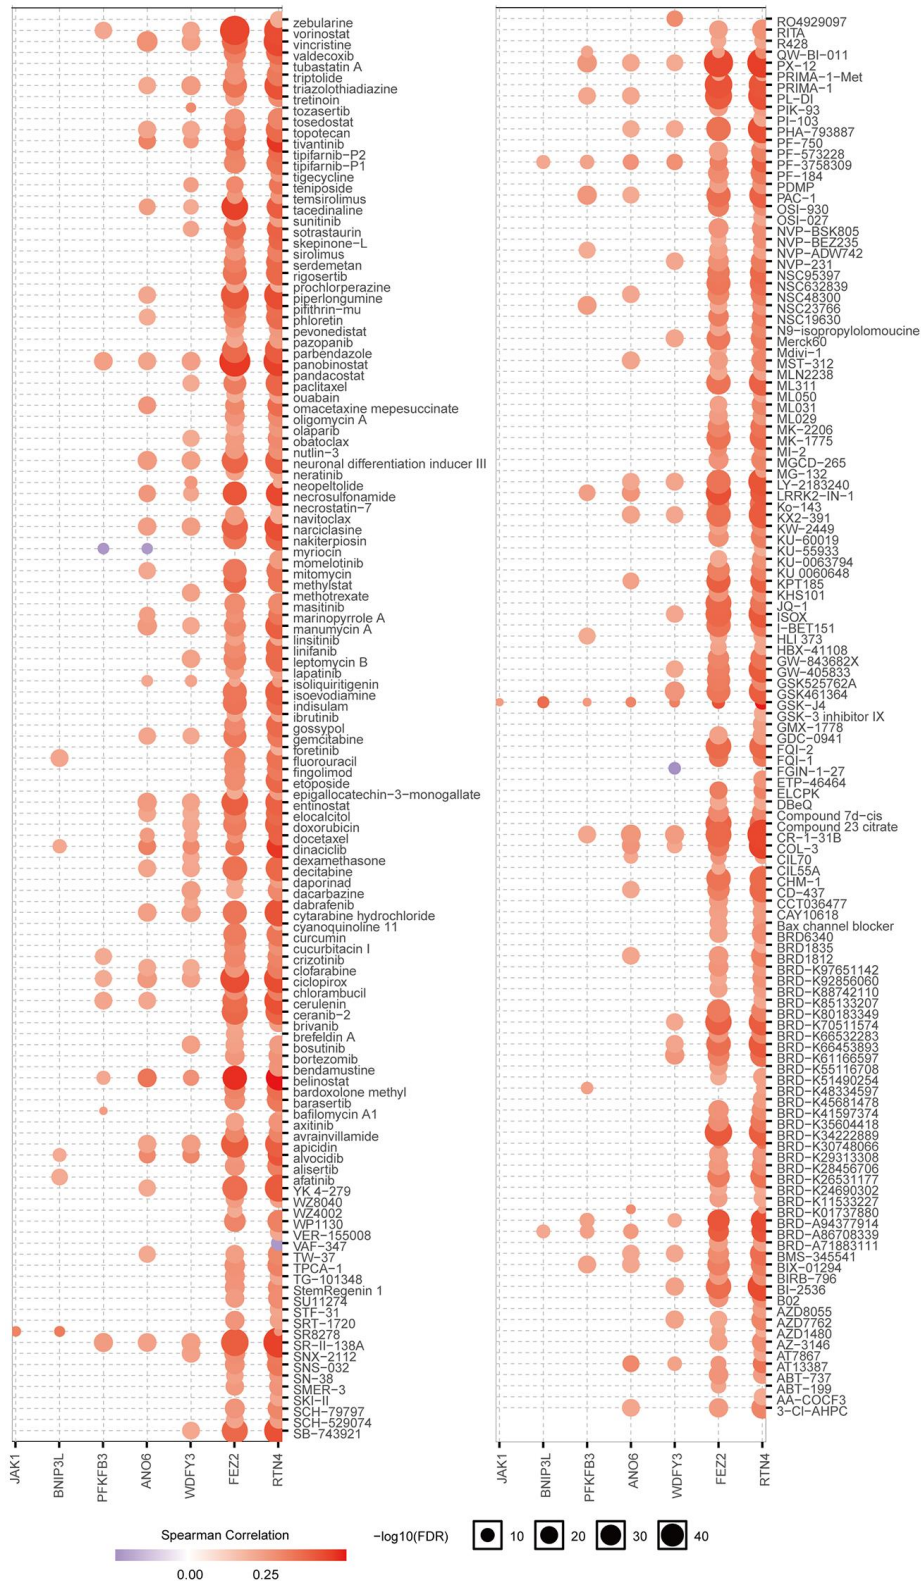

**Supplementary Figure 7. Drug sensitivity analysis associated with *PFKFB3*-related genes in pan-cancer.** We utilized the GSCALite and the CTRP database to analyze the drug sensitivity of *PFKFB3*-related genes in pan-cancer.

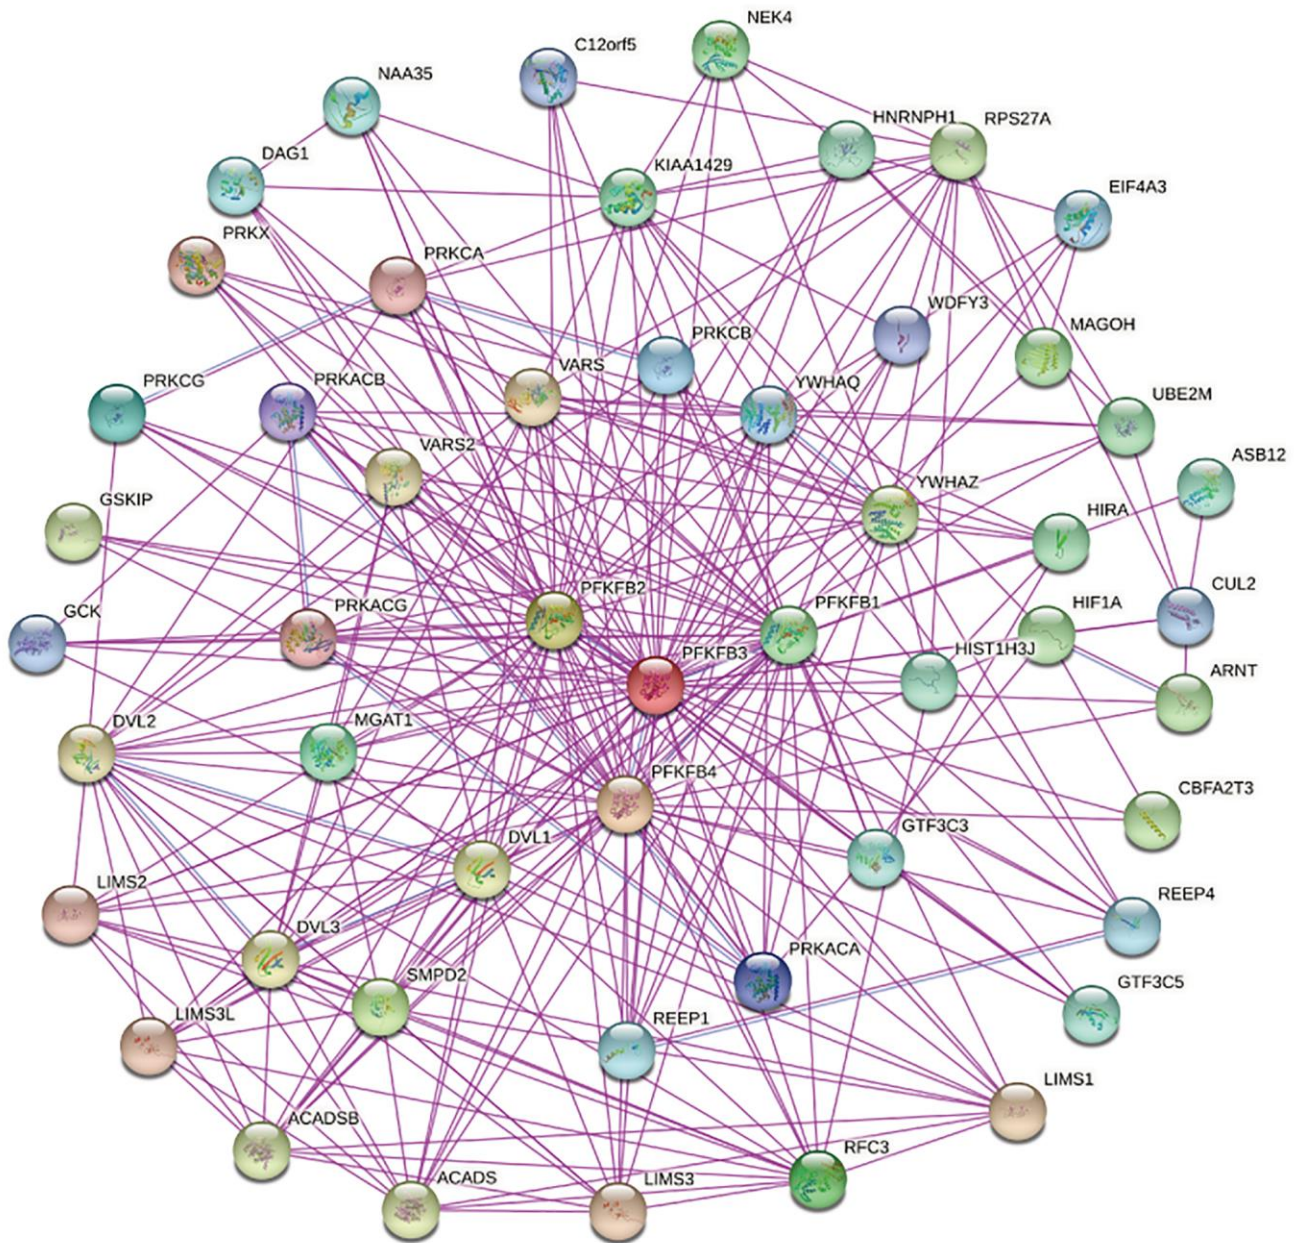

**Supplementary Figure 8. The interaction network of the PFKFB3-binding proteins.** We utilized STRING to obtain the interaction network of the top 50 PFKFB3-binding proteins.

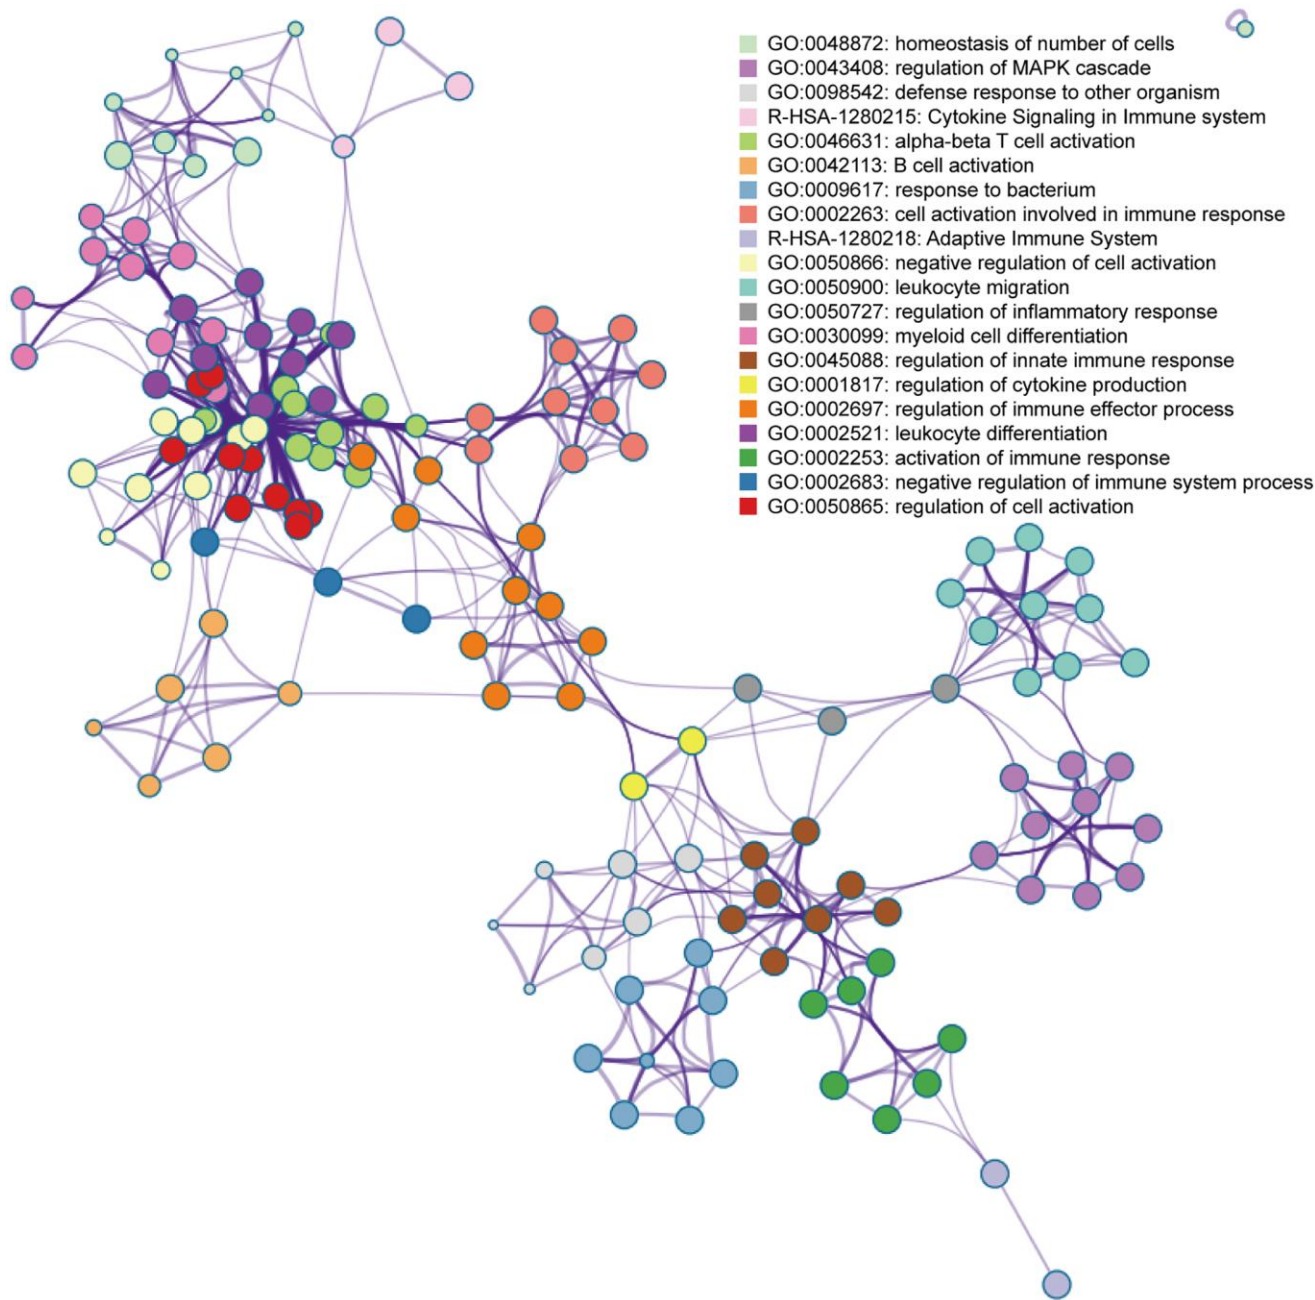

**Supplementary Figure 9. PFKFB3 involved in the regulation of immune system process in KIRP.** We utilized Metascape to analyze the *PFKFB3* co-expression immune genes network of enrichment. The network is colored by cluster ID.
